# Supplementary material for: Draft genome of the leopard gecko, Eublepharis macularius
Source: PubMed Central journal article supplement (PMC5080775; doi:10.1186/s13742-016-0151-4), 2016-10-26

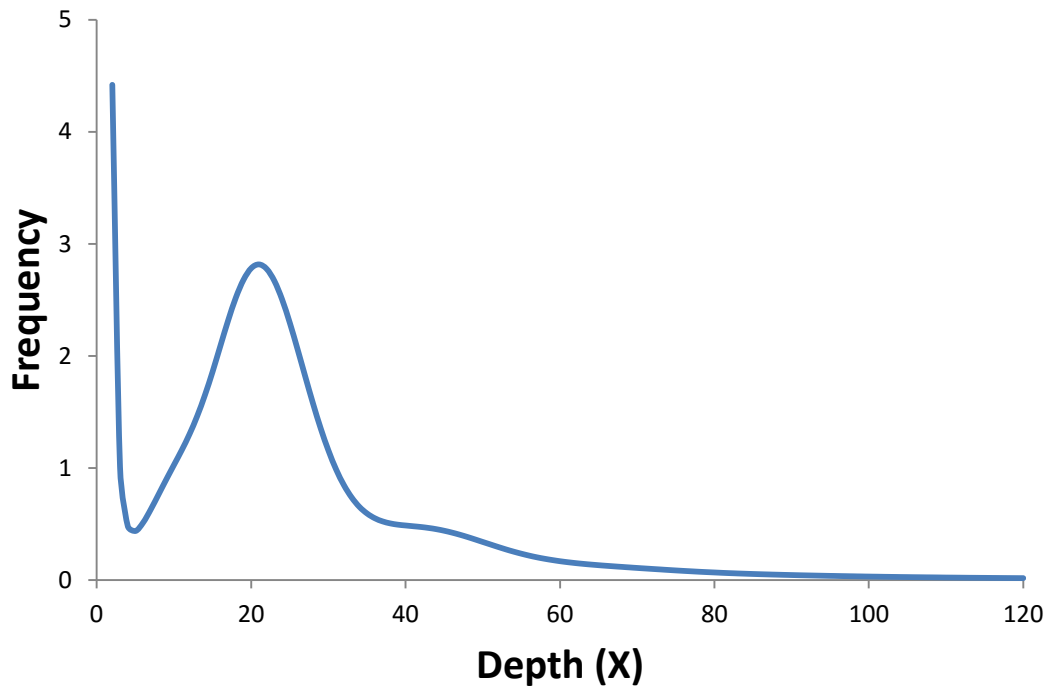

Supplement: 13742_2016_151_MOESM1_ESM.pdf [file 13742_2016_151_MOESM1_ESM.pdf]
